# Supplementary material for: HDMAC: A Web-Based Interactive Program for High-Dimensional Analysis of Molecular Alterations in Cancer
Source: PubMed Central journal article supplement (PMC7054321; doi:10.1038/s41598-020-60791-z), 2020-03-03
Supplement: 41598_2020_60791_MOESM1_ESM.pdf [file 41598_2020_60791_MOESM1_ESM.pdf]

## **HDMAC: A Web-Based Interactive Program for High-Dimensional Analysis of Molecular Alterations in Cancer**

Chung Chang<sup>1</sup>, Chan-Yu Sung<sup>1</sup>, Han Hsiao<sup>1</sup>, Jiabin Chen<sup>2</sup>, I-Hsuan Chen<sup>3-5</sup>, Wei-Ting Kuo<sup>3</sup>, Lung Fung Cheng<sup>3</sup>, Praveen Kumar Korla<sup>2</sup>, Ming-Jhe Chung<sup>1</sup>, Pei-Jhen Wu<sup>1</sup>, Chia-Cheng Yu<sup>3-5, 6, \*</sup>, Jim Jinn-Chyuan Sheu<sup>2, 7-9, \*</sup>

1, Department of Applied Mathematics, National Sun Yat-sen University, Taiwan, ROC

2, Institute of Biomedical Science, National Sun Yat-sen University, Taiwan, ROC

3, Department of Surgery, Kaohsiung Veterans General Hospital, Kaohsiung 81362, Taiwan, ROC

4, Department of Pharmacy, College of Pharmacy and Health Care, Tajen University, Pingtung County 90741, Taiwan, ROC

5, School of Medicine, National Yang-Ming University, Taipei 112, Taiwan, ROC

6, Department of Surgery, Tri-Service General Hospital, National Defense Medical Center, Taipei 114, Taiwan, ROC

7, Human Genetic Center, China Medical University Hospital, Taichung 40447, Taiwan, ROC

8 School of Chinese Medicine, China Medical University, Taichung 40402, Taiwan, ROC

9 Department of Health and Nutrition Biotechnology, Asia University, Taichung 41354, Taiwan, ROC

\*Corresponding Authors

Primary correspondence to Jim Jinn-Chyuan Sheu at  
National Sun Yat-sen University  
70 Lienhai Road, Kaohsiung 804, Taiwan, R.O.C.  
Tel: 886-7-5252000      Fax: 886-7-5253809  
Email: [jimsheu@mail.nsysu.edu.tw](mailto:jimsheu@mail.nsysu.edu.tw)

# HDMAC Tutorial

The high-dimensional analysis of cancer-associated genetic alterations, HDMAC, was developed to analyze high-dimensional genetic covariates, with the choice of including clinical covariates, with several regression models suitable for high-dimensional analysis and to identify important genetic alterations which could be used to construct a fitted multivariate regression model while its prediction power could be estimated by cross validation. HDMAC also allows choice of a penalty type for the corresponding penalized regression model for high-dimensional data and a first-step screening to screen out unrelated variables if the multiple-testing problem is of concern via control of the false discovery rate (FDR). Below is a tutorial on how to use HDMAC with respect of both survival data and binary outcome. The platform is available at <http://ripsung26.shinyapps.io/rshiny>.

## Data Upload/Toy Example

To begin the analysis of your data, go to the website listed above and click the tab "Upload Data". On the left of the page, you may choose whether to upload your own data or use the toy example we provided on the site. The data you upload or from our toy example are shown on the right. You may also choose which columns are shown on the front page.

The screenshot shows the HDMAC web application interface. At the top, there are tabs for "HD-MAC", "Upload data", "Binary Response : Logistic Regression Model", and "Survival Response : CoxPH Model". On the left, there is a panel for data selection with a dropdown menu set to "Toy\_example" and input fields for "Show columns of data from" (1) and "to" (10). The main area displays a table of 10 patients with 12971 variables. The table has columns for V1, PATIENT\_ID, HISTOLOGICAL\_SUBTYPE, stage, gender, age, BMI, hist, smoke, and final. Below the table, there are checkboxes for each column to be displayed. A search bar is located at the top right of the table area. At the bottom, there is a pagination control showing "Showing 1 to 10 of 189 entries" and a set of buttons for "Previous", "1", "2", "3", "4", "5", "...", "19", and "Next".

| V1 | PATIENT_ID   | HISTOLOGICAL_SUBTYPE | stage     | gender | age | BMI      | hist | smoke | final |
|----|--------------|----------------------|-----------|--------|-----|----------|------|-------|-------|
| 1  | TCGA-BL-A0CB | 0                    | Stage I   | 1      | 73  | 42.41689 | 1    | 3     | 0     |
| 2  | TCGA-BL-A13I | 0                    | Stage III | 0      | 57  | 20.69049 | 1    | 2     | 1     |
| 3  | TCGA-BL-A13J | 1                    | Stage IV  | 1      | 65  | 22.98540 | 0    | 2     | 1     |
| 4  | TCGA-BL-A5ZZ | 1                    | Stage III | 0      | 60  | 26.72287 | 0    | 4     | 1     |
| 5  | TCGA-BT-A2LD | 0                    | Stage IV  | 0      | 78  | 38.57876 | 1    | 1     | 1     |
| 6  | TCGA-BT-A3PK | 1                    | Stage II  | 1      | 60  | 27.77778 | 0    | 1     | 0     |
| 7  | TCGA-BT-A42C | 1                    | Stage II  | 1      | 64  | 25.53670 | 0    | 2     | 0     |
| 8  | TCGA-BT-A42E | 0                    | Stage III | 1      | 74  | 28.71972 | 1    | 5     | 1     |
| 9  | TCGA-BT-A42F | 0                    | Stage IV  | 1      | 64  | 31.48148 | 1    | 3     | 1     |
| 10 | TCGA-C4-A0EZ | 0                    | Stage IV  | 0      | 69  | 28.60971 | 1    | 2     | 1     |

The size limit to the data you upload is 50 MB. It may take a few moments for your data to upload dependent on the size.

Select toy example or upload your own data

Upload\_data

Upload your own csv file

Browse...    No file selected

1. Data size limit is 50 MB.
2. Your data should be consisted of response variable, genetic covariates (necessary) and clinical ones (optional).
3. The clinical covariates (including response) should precede the genetic.

Header

stringsAsFactors

Show columns of data from

1

to

10

Select toy example or upload your own data

Upload\_data

Upload your own csv file

Browse...    Ova\_TCGA\_OS\_clinical\_muta\_cleaned\_313\_13\_670.csv

Upload complete

1. Data size limit is 50 MB
2. Your data should be consisted of response variable, genetic covariates (necessary) and clinical ones (optional).
3. The clinical covariates (including response) should precede the genetic.

Header

stringsAsFactors

Show columns of data from

1

to

10

There are 313 patients and 683 variables.

Show:  entries    Search:

| V1              | AGE | CLINICAL_STAGE | DFS_MONTHS | DFS_STATUS          | GRADE | LONGEST_DIMENSION | LYMPHOVASCULAR_INVAS |
|-----------------|-----|----------------|------------|---------------------|-------|-------------------|----------------------|
| TCGA.61.2009.01 | 65  | 1              | 3.32       | Recurred/Progressed | G3    | 2.0               | YES                  |
| TCGA.13.0730.01 | 71  | 1              |            |                     | G3    | 1.1               |                      |
| TCGA.13.1483.01 | 61  | 1              | 9.76       | Recurred/Progressed | G3    | 1.8               |                      |
| TCGA.25.1315.01 | 50  | 1              | 5.03       | Recurred/Progressed | G3    | 3.5               |                      |
| TCGA.13.1505.01 | 63  | 1              | 51.28      | Recurred/Progressed | G3    | 1.2               |                      |
| TCGA.24.1426.01 | 43  | 1              | 5.35       | DiseaseFree         | G3    | 1.2               | YES                  |
| TCGA.61.2101.01 | 55  | 1              |            |                     | G2    | 1.5               |                      |
| TCGA.13.0891.01 | 73  | 1              | 25.03      | Recurred/Progressed | G3    | 1.4               |                      |
| TCGA.24.1105.01 | 36  | 1              | 15.44      | Recurred/Progressed | G3    | 1.4               |                      |
| TCGA.25.2400.01 | 76  | 1              | 18.96      | Recurred/Progressed | G3    | 1.1               |                      |

V1    AGE    CLINICAL\_STAGE    DFS\_MONTHS    DFS\_STATUS    GRADE    LONGEST\_DIMENSION    LYMPHOVASCULAR\_INVAS

Showing 1 to 10 of 313 entries

Previous    1    2    3    4    5    ...    32    Next

Once the data are uploaded, you may begin your analysis. For survival data, click the tab “Survival Regress: CoxPH Model”. For binary outcomes, click the tab “Binary Regression: Logistic Regression Model”.

### Survival Analysis

The data used here to illustrate how to run survival analysis on HDMAC contain the information of 8,310 mutated genes from 316 patients with serous type, high grade ovarian cancer from TCGA. The aim is to relate gene mutations to the patients’ overall survival.

1. Choose the tab “Survival Response: CoxPH Model” and locate all the variables needed for the analysis in the data uploaded. Inclusion of clinical variables is optional. Then choose the Cox regression method desired. Three are available: ridge, Lasso and adaptive Lasso.

## Cox PH Model:

$$h(t) = h_0(t) \times e^{\beta^T X_i}$$

## Response

Choose the time variable

OS\_MONTHS

Choose the event variable

OS\_STATUS

## Covariates

Genetic covariates columns from

14

to

683

PS: Binary covariates should be represented by 0 and 1.

Define continuous clinical covariates (optional)

Click here

Define categorical clinical covariates (optional)

Click here

Choose the covariates to fit in model (optional):

Click here

## Choose regression penalty for the model

Regression penalty

Adaptive Lasso

2. Print the gene list. [Optional:] Choose whether the initial screening to control the FDR is desired. If chosen (the box before "Use FDR for screening" is checked as shown below), the p-value threshold is set at 0.05. The number of cross-validation (CV) folds for testing the prediction power (C-index in the case of survival analysis) is set at 1 as the default for printing out gene lists. It is possible to change the CV fold for statistical tests, which is illustrated in the next step.

## Screening (optional)

 Use FDR for screening

p-value threshold

0.05

## Cross-Validation for prediction power (optional)

Number of cv folds

1

 Run!

Hit "Run" and the gene list with each gene's coefficient and p value will be printed on the page.

---

## Final Result

---

Gene List, estimated coefficients and p-values

Prediction Power

### Estimated coefficients and p-values

```
$coef.and.p
  gene_list estimated_coefficient      p_value
1   ZSWIM8    2.00415824911257 7.93215458047011e-05
2   PABPC3    1.71714635029121 0.000715495944217121
```

3. (Optional) To test the prediction power of the results, set the CV folds at 5 and hit RUN.

### Screening (optional)

Use FDR for screening

p-value threshold

0.05

### Cross-Validation for prediction power (optional)

Number of cv folds

5

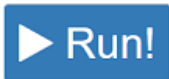

The concordance index, C-index, will be calculated to show the prediction power.

---

## Final Result

---

Gene List, estimated coefficients and p-values

Prediction Power

C-index

Concordance index. C-index it measures how well the model discriminates between different responses, i.e., is your predicted response low for low observed responses and high for high observed responses.

```
[1] 0.4972057
```

## Binary Outcome

The data used here to illustrate how to run logistic regression in response to a binary outcome on HDMAC contain the information of 18,335 entries of mRNA expression of 189 patients with bladder cancer from TCGA. The aim is to relate abnormal mRNA expression to the patients' cancer subtype, invasive vs. non-invasive.

1. Choose the tab “Binary Response: Logistic Regression Model” and locate all the variables needed for the analysis in the data uploaded. Inclusion of clinical variables is optional. Then choose the logistic regression method desired. Three are available: ridge, Lasso and adaptive Lasso.

Genetic Analysis From cBioPortal   Upload data   **Binary Response : Logistic Regression Model**   Survival Response : CoxPH Model

Logistic Regression Model:

$$P(Y_i = 1|X_i) = \frac{e^{\beta^T X_i}}{1 + e^{\beta^T X_i}} \Leftrightarrow \log\left(\frac{P(Y_i = 1|X_i)}{P(Y_i = 0|X_i)}\right) = \beta^T X_i$$

### Response

Choose the response variable

HISTOLOGICAL\_SUBTYPE

### Covariates

Genetic covariates columns from

4948

to

12971

PS: Binary covariates should be represented by 0 and 1.

Define continuous clinical covariates (optional)

Click here

Define categorical clinical covariates (optional)

Click here

Choose clinical covariates to fit model (optional):

Click here

### Choose regression penalty for the model

Regression penalty

Adaptive Lasso

2. Print the gene list. [Optional:] Choose whether the initial screening to control the FDR is desired. If chosen (the box before “Use FDR for screening” is checked as shown below), the p-value threshold is set at 0.05. The number of cross-validation (CV) folds for testing the prediction power (sensitivity, specificity, accuracy and area under curve (AUC) in the case of logistic regression) is set at 1 as the default for printing out gene lists. It is possible to change the CV fold for statistical tests, which is illustrated in the next step.

### Screening (optional)

Use FDR for screening

p-value threshold

0.05

### Cross-Validation for prediction power (optional)

Number of CV folds

1

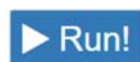

Genetic covariates columns from 4948 to 12971

Hit “Run” and the gene list with each gene’s coefficient and p value will be printed on the page.

## Final Result

Gene List, estimated coefficients and p-values

Prediction Power

### Gene list, estimated coefficients and p-values

```
$coef.and.p
  gene_list estimated_coefficient      p_value
1   SPTSSA      -0.156997435976  0.507432675387873
2   ATAT1       0.0645544675302372  0.465140453927364
3   CABP4       0.25563910739168    0.105231535604245
4   CCNK       -0.267889957896636    0.189086746946374
5   CIR1       0.548111051382859    0.498533011172238
6   DPP9       0.417290082265505    0.0513867305149367
7   FANCL     0.00811012698940946    0.921298999547267
8   ICOSLG    -0.661599439029748    0.00457770627109811
9   JOSD1    -0.34525522387081    0.536529827233434
10  MED30    -0.427390776433774    0.00509724460953874
11  NADSYN1  -0.71086241148283    0.267423965046945
12  NCOA3    -0.522909533503091    0.00328788258680913
13  LINC00173 -0.122313676831379    0.657342971141993
14  NKIRAS1  -0.291523233294147    0.0980830089761888
15  NUDT16P1  0.243261116801207    0.154617778676624
16  PDRG1   -0.693371786736194    0.485094004547082
17  POLR1D   0.548242355818826    0.0163494427594439
18  PSORS1C2  1.141490537781  8.37984637017003e-05
19  RETSAT   -0.316509356633728    0.179141161077715
20  RPL23AP7 -0.656214021472041    0.00865333695527046
21  SETMAR   0.28719381446673    0.519002797134722
22  SLC14A1  0.502245058310408    0.0529791613094708
23  SLC39A4  0.138888570580463    0.653141097318773
24  ZSCAN2   0.27041666667045    0.161834300293155
```

3. (Optional) To test the prediction power of the results, set the CV folds at 5 and hit RUN.

### Screening (optional)

Use FDR for screening

p-value threshold

0.05

### Cross-Validation for prediction power (optional)

Number of CV folds

5

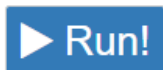

Genetic covariates columns from 4948 to 12971

The sensitivity, specificity, accuracy, and AUC will be calculated to show the prediction power.

---

## Final Result

---

[Gene List, estimated coefficients and p-value](#)

Prediction Power

Sensitivity

[1] 0.516129

Specificity

[1] 0.6771654

Accuracy

[1] 0.6243386

AUC (%)

[1] 0.635588



Supplementary Table S1. Logistic regression methods in analysis on mRNA expression abnormalities and gene mutations in response to lymphovascular invasion of ovarian cancer and validation

| Logistic regression |             | Ridge  |          | Lasso  |          | Adaptive Lasso |          |
|---------------------|-------------|--------|----------|--------|----------|----------------|----------|
|                     |             | mRNA   | mutation | mRNA   | mutation | mRNA           | mutation |
| number of genes     |             | 9548   | 567      | 28     | 5        | 17             | 5        |
| Test statistics     | Sensitivity | 0.750  | 0.609    | 0.643  | 0.913    | 0.667          | 0.913    |
|                     | Specificity | 0.581  | 0.476    | 0.395  | 0.048    | 0.465          | 0.048    |
|                     | Accuracy    | 0.693  | 0.559    | 0.559  | 0.586    | 0.598          | 0.586    |
|                     | AUC *       | 68.294 | 52.322   | 62.103 | 47.598   | 63.104         | 47.598   |

\*AUC, area under curve.

Genes selected by the adaptive Lasso

| Mutated genes | Estimated coefficients | log odds | p-value | Abnormally expressed genes | Estimated coefficients | log odds | p-value |
|---------------|------------------------|----------|---------|----------------------------|------------------------|----------|---------|
| ANKRD11       | -0.0993                | 0.9054   | 0.7050  | CDR2L                      | 0.42                   | 1.521    | 0.12    |
| BPIFB2        | -0.1331                | 0.8753   | 0.7417  | CTSD                       | 0.29                   | 1.336    | 0.43    |
| GAB2          | -0.0992                | 0.9055   | 0.7997  | HNRNPAB                    | -0.77                  | 0.463    | 0.00    |
| IDSF10        | -0.0997                | 0.9051   | 0.7033  | UFL1                       | -0.32                  | 0.726    | 0.10    |
| VSIG2         | -0.0997                | 0.9051   | 0.7050  | LONP2                      | -0.69                  | 0.501    | 0.00    |
|               |                        |          |         | PCNP                       | -0.18                  | 0.835    | 0.23    |
|               |                        |          |         | RFXAP                      | -0.13                  | 0.878    | 0.40    |
|               |                        |          |         | SALL2                      | -0.15                  | 0.860    | 0.20    |
|               |                        |          |         | SCAMP2                     | 0.25                   | 1.284    | 0.19    |
|               |                        |          |         | SPINK5                     | -0.07                  | 0.932    | 0.64    |
|               |                        |          |         | ZNF74                      | -0.06                  | 0.941    | 0.69    |

Supplementary Table S2. Numbers of genes and c-indices with mutations and mRNA expression abnormalities in response to overall survival of bladder cancer

| Cox PH method                 |           | Ridge   |         | Lasso   |         | Adaptive Lasso |         |
|-------------------------------|-----------|---------|---------|---------|---------|----------------|---------|
| mutated genes                 |           | numbers | c-index | numbers | c-index | numbers        | c-index |
|                               |           | no FDR  | 4937    | 0.566   | 2       | 0.506          | 2       |
|                               | after FDR | 28      | 0.468   | 13      | 0.484   | 11             | 0.495   |
| mRNA expression abnormalities |           | numbers | c-index | numbers | c-index | numbers        | c-index |
|                               | no FDR    | 8024    | 0.547   | 10      | 0.595   | 10             | 0.576   |
|                               | after FDR | 6       | 0.586   | 6       | 0.603   | 5              | 0.609   |

Genes selected by the adaptive Lasso

| Mutated genes | Estimated coefficients | Hazard ratio | p-value | Abnormally expressed genes | Estimated coefficients | Hazard ratio | p-value |
|---------------|------------------------|--------------|---------|----------------------------|------------------------|--------------|---------|
| BCAS3         | 1.07                   | 2.915        | 0.12    | EFCAB1                     | 0.16                   | 1.521        | 0.02    |
| C2ORF42       | 2.27                   | 9.679        | 0.02    | NEBL                       | 0.26                   | 1.296        | 0.02    |
| YAE1D1        | 0.83                   | 2.293        | 0.42    | RASAL2                     | 0.15                   | 1.161        | 0.01    |
| CNN1          | 1.29                   | 3.632        | 0.29    | SLC1A6                     | 0.34                   | 1.404        | 0.00    |
| DNAJB11       | 1.78                   | 5.929        | 0.08    | UCHL5                      | 0.05                   | 1.051        | 0.24    |
| IFNGR2        | 3.50                   | 33.11        | 0.00    |                            |                        |              |         |
| MKL2          | 0.89                   | 2.435        | 0.23    |                            |                        |              |         |
| NRXN3         | 1.70                   | 5.473        | 0.02    |                            |                        |              |         |
| NUB1          | 2.66                   | 14.29        | 0.00    |                            |                        |              |         |
| OR4A47        | 2.40                   | 11.02        | 0.01    |                            |                        |              |         |
| TROAP         | 0.22                   | 1.246        | 0.83    |                            |                        |              |         |
